# Supplementary material for: MXene quantum dot rivet reinforced Ni–Co LDH for boosting electrochemical activity and cycling stability
Source: Royal Society of Chemistry journal article supplement (doi:10.1039/d1ma00474c), 2021-01-01
Supplement: d1ma00474c1.pdf [file d1ma00474c1.pdf]

## Supplementary Information

### **MXene quantum dots rivet reinforced Ni-Co LDH for boosting electrochemical activity and cycling stability**

Lili Song, ‡<sup>a</sup> Shifan Zhu, ‡<sup>a</sup> Le Tong <sup>a</sup>, Wandi Wang <sup>a</sup>, Chun Ouyang <sup>b,c</sup>, Feng Xu <sup>c</sup> and Yuqiao Wang <sup>\*a</sup>

<sup>a</sup>. Institute of Advanced Materials, School of Chemistry and Chemical Engineering, Southeast University, Nanjing, Jiangsu 211189, China

<sup>b</sup>. School of Material Science and Engineering, Jiangsu University of Science and Technology, Jiangsu 212003, China

<sup>c</sup>. CETC Maritime Electronics Research Institute Co., Ltd., Ningbo Zhejiang 315000, China

‡. These authors contributed equally to this work.

\*. Corresponding author. E-mail address: yqwang@seu.edu.cn (Y. Wang)

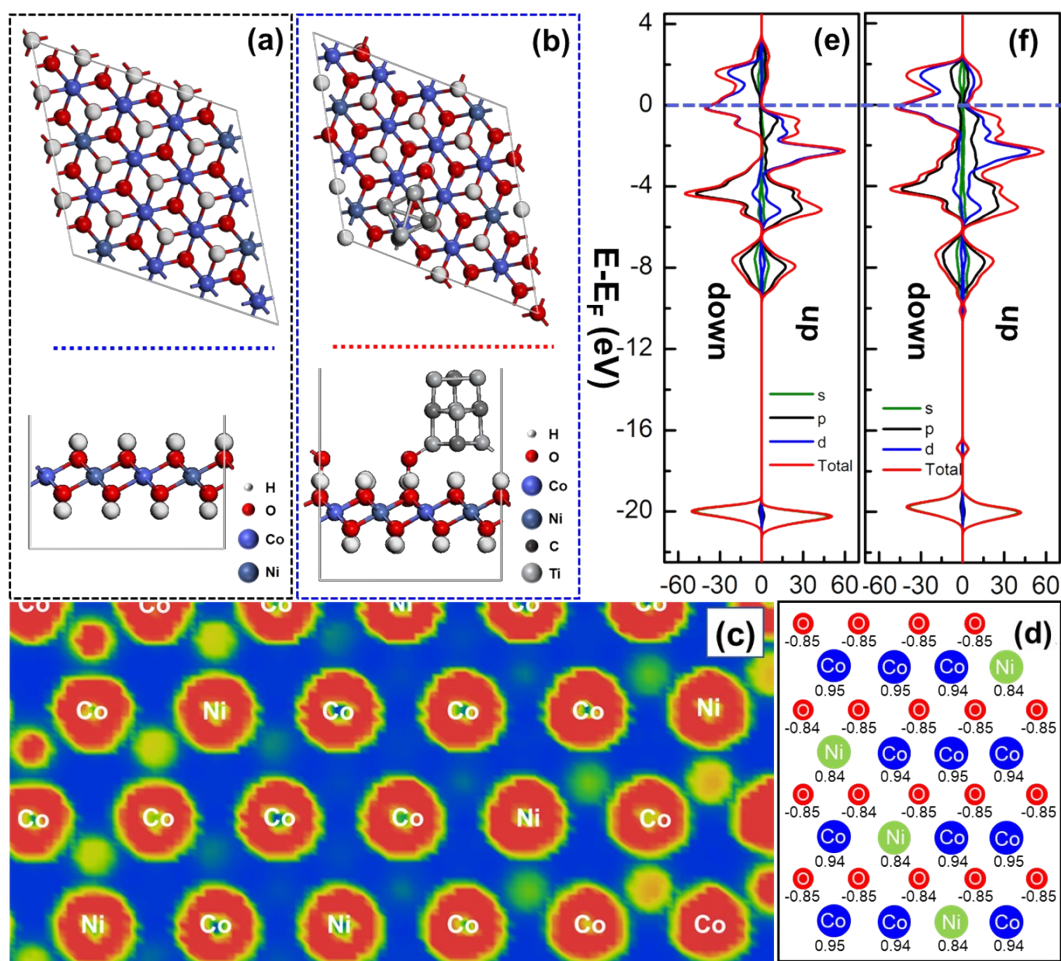

**Fig. S1.** (a, b) Calculated models of primary Ni-Co LDH and Ni-Co LDH@MQDs. (c, d) ELFM mapping and calculated net charge of Ni, Co and O atoms in the primary Ni-Co LDH. (e, f) PDOS of the Ni-Co LDH and Ni-Co LDH@MQDs.

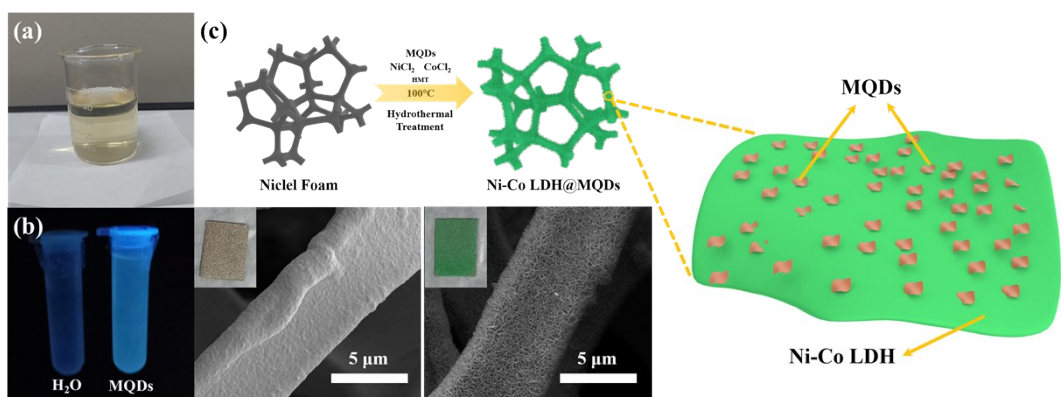

**Fig. S2.** (a) Physical diagram of MQDs aqueous solution. (b) Photoluminescence of MQDs under 365 nm UV light. (c) Schematic illustration of the preparation Ni-Co LDH@MQDs

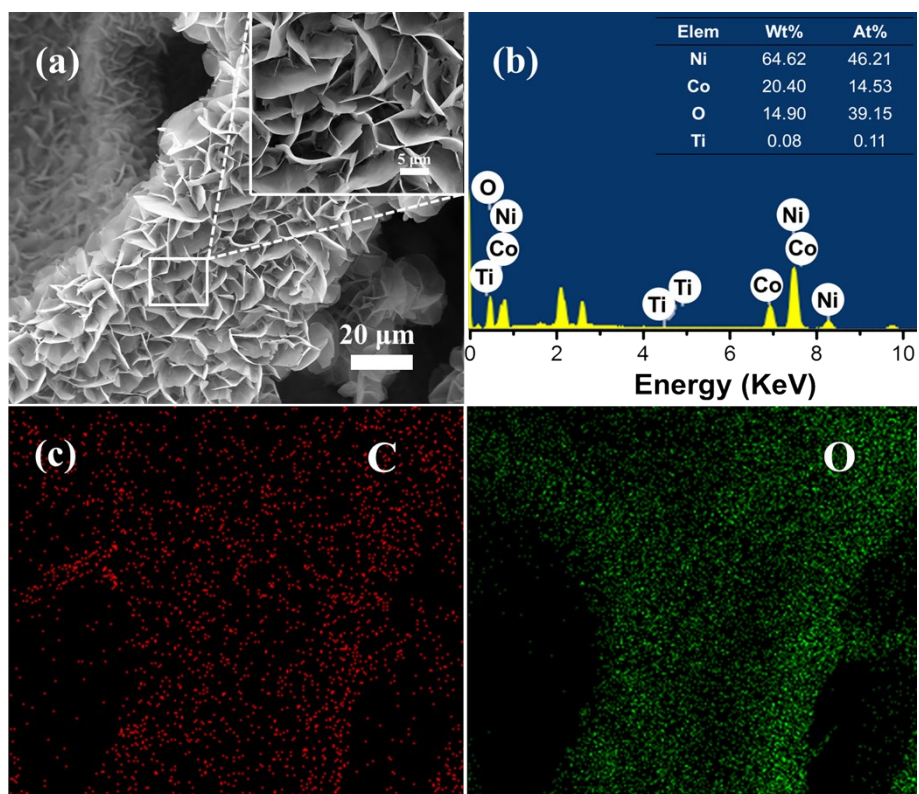

**Fig. S3.** (a) SEM image of Ni-Co LDH. (b) EDS spectrum and the table of element content. (c) uniform distribution (C, O) in Ni-Co LDH@MQDs.

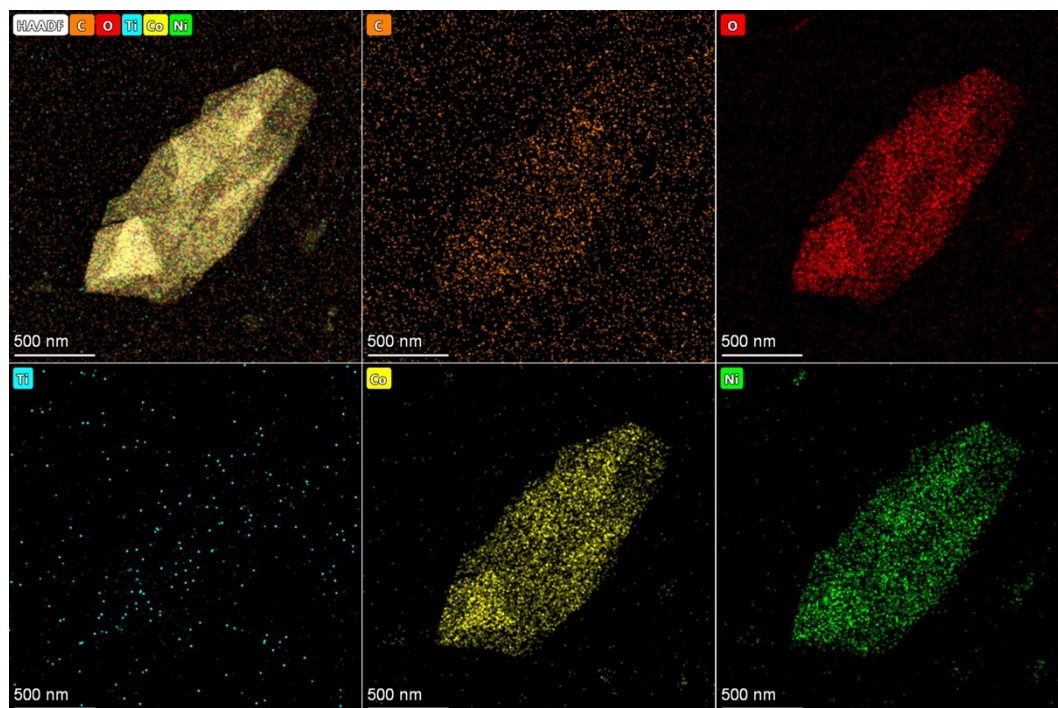

**Fig. S4.** The high-angle annular dark-field (HAADF)-STEM image and elemental mapping images.

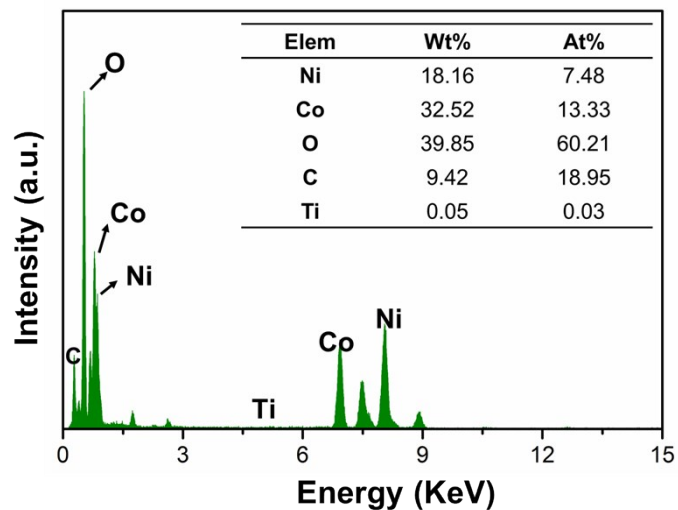

Fig. S5. The element contents of Ni-Co LDH@MQDs in the STEM image at Fig. S4.

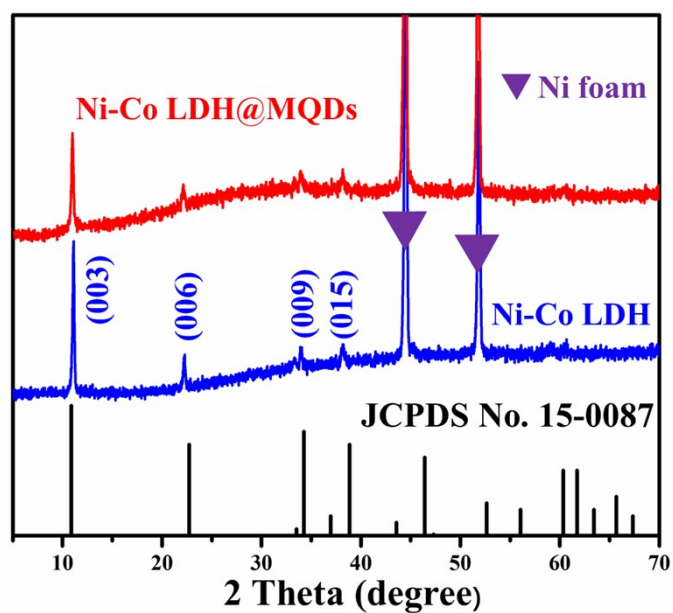

Fig. S6. XRD patterns of Ni-Co LDH and Ni-Co LDH@MQDs on Ni foam.

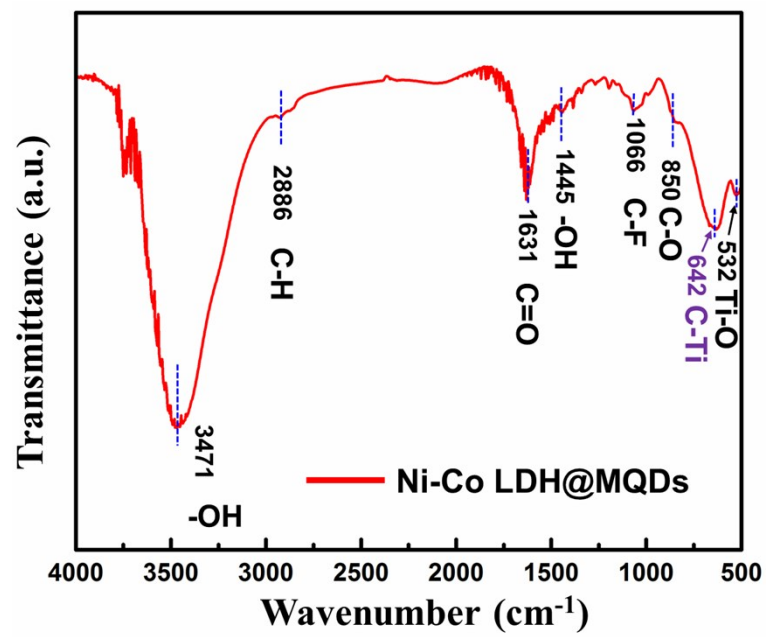

Fig. S7. FT-IR spectrum of Ni-Co LDH@MQDs.

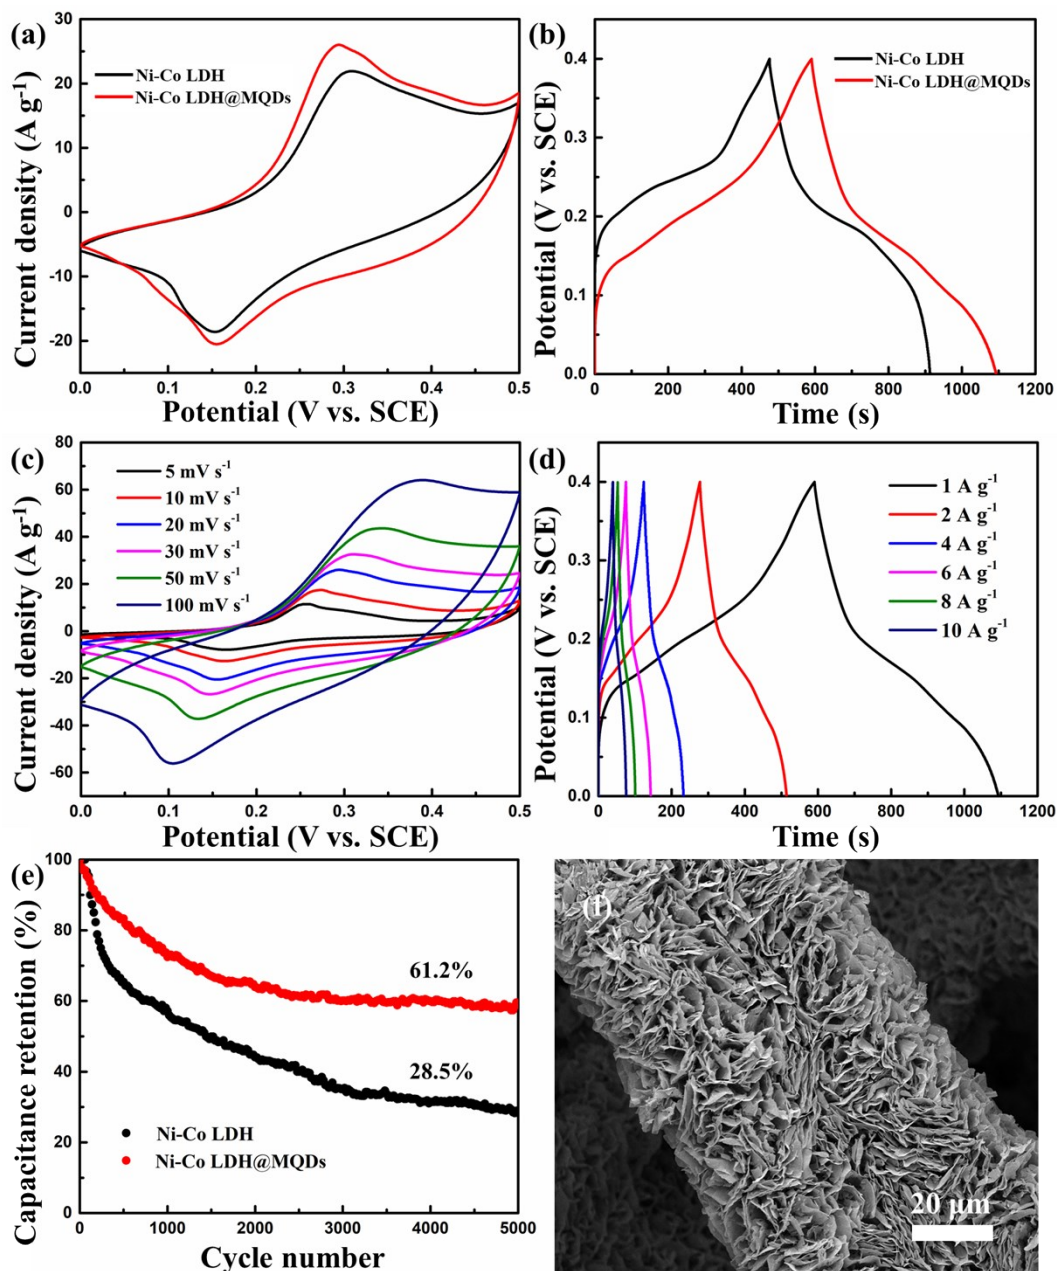

**Fig. S8.** (a) CV curves at a scan rate of  $20 \text{ mV s}^{-1}$ . (b) GCD profiles at a current density of  $1 \text{ A g}^{-1}$ . (c) CV curves at different scan rates and (d) GCD profiles at different current densities of Ni-Co LDH@MQDs. (e) Cyclic performance of Ni-Co LDH and Ni-Co LDH@MQDs at a current density  $6 \text{ A g}^{-1}$ . (f) SEM image of Ni-Co LDH@MQDs after 5000 cycles at  $6 \text{ A g}^{-1}$ .

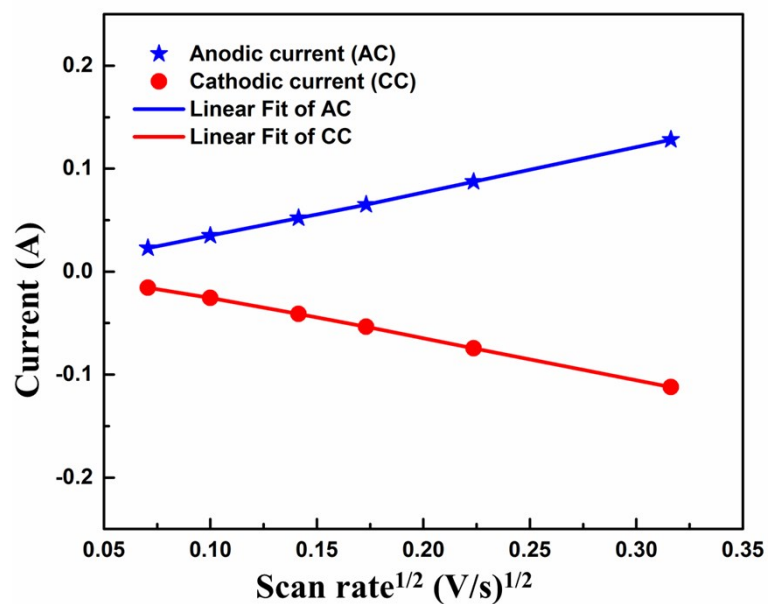

**Fig. S9.** The variation of cathodic/anodic peak currents for the Ni-Co LDH@MQDs as a function of the square root of scan rates.

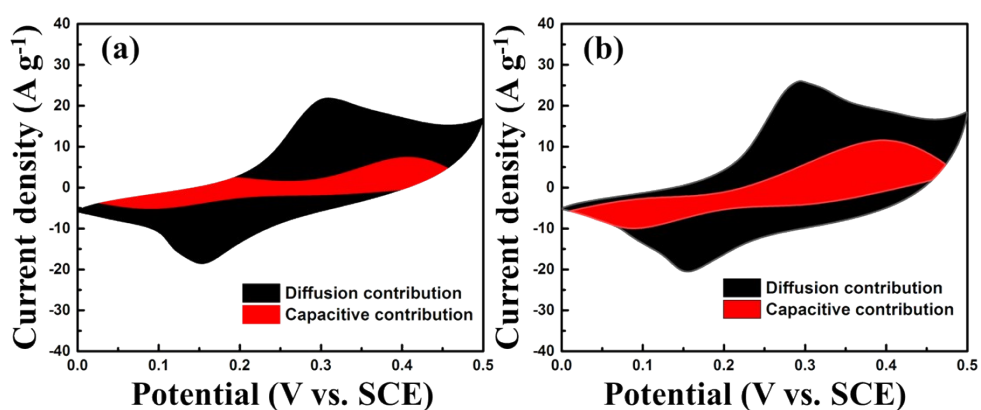

**Fig. S10.** (a, b) Capacitive and diffusion-controlled contributions of Ni-Co LDH and Ni-Co LDH@MQDs at 20 mV s<sup>-1</sup>.

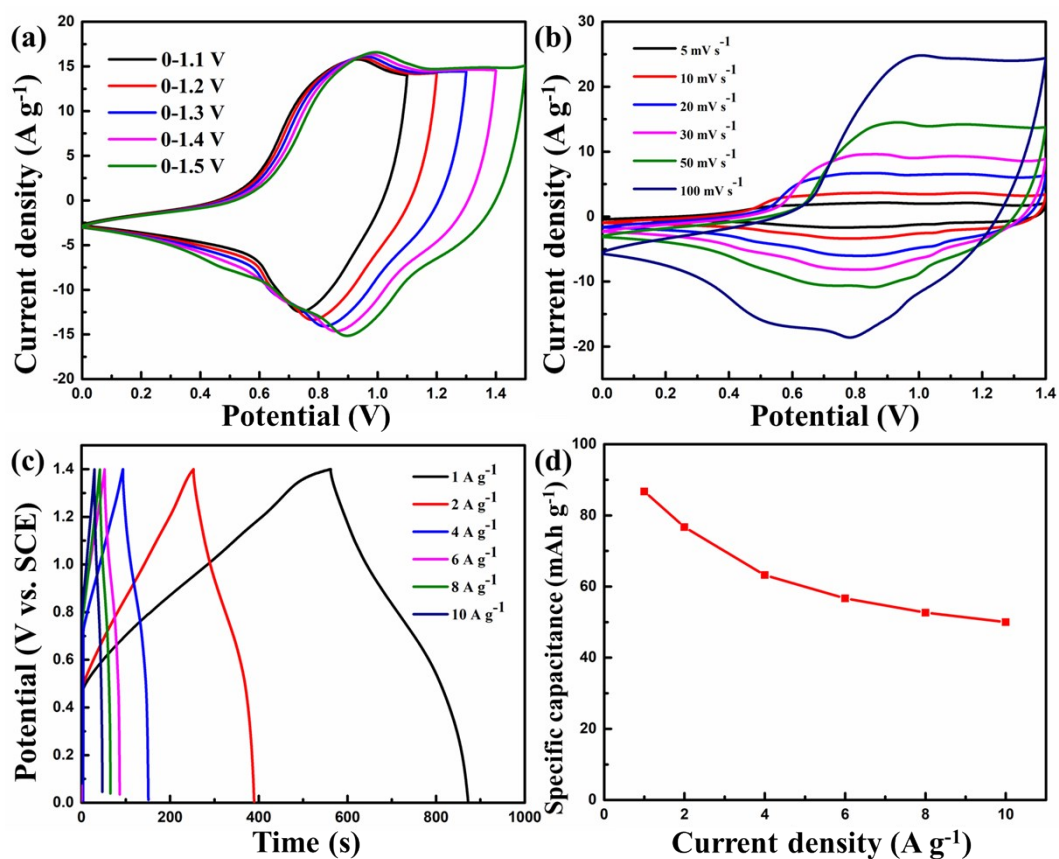

**Fig. S11.** (a) CV curves of Ni-Co LDH@MQDs//AC in different scan voltage windows at scan rate of 50 mV s<sup>-1</sup>. (b) CV curves of Ni-Co LDH@MQDs//AC at different scan rates. (c) GCD profiles and (d) Capacitors of Ni-Co LDH@MQDs//AC at different current densities.

**Table S1.** The simulated EIS data.

| Samples         | $R_s$ (Ohm/cm <sup>2</sup> ) | $R_{ct}$ (Ohm/cm <sup>2</sup> ) | $C$ (mF/cm <sup>2</sup> ) | $W$ (s <sup>1/2</sup> /cm <sup>2</sup> ) |
|-----------------|------------------------------|---------------------------------|---------------------------|------------------------------------------|
| Ni-CoLDH        | 1.04                         | 2.54                            | 1.97                      | 0.0193                                   |
| Ni-CoLDH @ MQDs | 0.76                         | 1.52                            | 2.75                      | 0.0214                                   |



**Table S2.** Comparison of energy density vs power density of reported supercapacitors.

| Electrode                                                             | Energy density (W h kg <sup>-1</sup> ) | Power density (W kg <sup>-1</sup> ) | Ref.      |
|-----------------------------------------------------------------------|----------------------------------------|-------------------------------------|-----------|
| Co <sub>9</sub> S <sub>8</sub> /NS-C//AC                              | 14.8                                   | 681                                 | Ref. 1    |
| CuCo <sub>2</sub> S <sub>4</sub> //AC                                 | 46.1                                   | 992                                 | Ref. 2    |
| FeCo <sub>2</sub> O <sub>4</sub> @MnO <sub>2</sub> //AC               | 22.2                                   | 978                                 | Ref. 3    |
| Co <sub>0.85</sub> Se//AC                                             | 39.0                                   | 789                                 | Ref. 4    |
| Ni <sub>3</sub> S <sub>2</sub> @d-Ti <sub>3</sub> C <sub>2</sub> //AC | 23.6                                   | 4004                                | Ref. 5    |
| MnO <sub>2</sub> //AC                                                 | 32.8                                   | 178                                 | Ref. 6    |
| Co/Cu-MOF/Cu <sub>2+1</sub> O//AC                                     | 25.7                                   | 740.4                               | Ref. 7    |
| CoFe <sub>2</sub> O <sub>4</sub> //AC                                 | 22.9                                   | 900                                 | Ref. 8    |
| Ni(OH) <sub>2</sub> @AC@CNT//AC                                       | 32.3                                   | 505                                 | Ref. 9    |
| Ni-Co LDH@MQDs//AC                                                    | 60.7                                   | 698                                 | This work |

**Table S3.** Comparison of the cycling stability of other reported devices.

| Devices                                                      | Current density       | Cycle performance        | Ref.      |
|--------------------------------------------------------------|-----------------------|--------------------------|-----------|
| Ni-Co LDH@MQDs//AC                                           | 6 A g <sup>-1</sup>   | 98.6 after 10000 cycles  | This work |
| ZnNi-CoP/NF//PPD-rGOs                                        | 10 A g <sup>-1</sup>  | 89% after 8000 cycles    | Ref. 10   |
| NiO/Co <sub>3</sub> O <sub>4</sub> @NF//AC                   | 5 A g <sup>-1</sup>   | 82.5% after 12000 cycles | Ref. 11   |
| NiCo <sub>2</sub> O <sub>4</sub> /NF//AC                     | 1 A g <sup>-1</sup>   | 81.1% after 5000 cycles  | Ref. 12   |
| CF@NiCoZnLDH/Co <sub>9</sub> S <sub>8</sub> -<br>QD//CNS-SCN | 3 A g <sup>-1</sup>   | 95.3% after 8000 cycles  | Ref. 13   |
| NiCoP/Ni-CoOH//PC                                            | 2 A g <sup>-1</sup>   | 92% after 1000 cycles    | Ref. 14   |
| L-Ni(OH) <sub>2</sub> @PPy//G-30PPPy                         | 3 A g <sup>-1</sup>   | 91.5% after 6000 cycles  | Ref. 15   |
| NCLP@NiMn-LDH//AC                                            | 10 A g <sup>-1</sup>  | 80% after 10000 cycles   | Ref. 16   |
| KCu <sub>7</sub> S <sub>4</sub> @NiMn LDH//AG                | 2.5 A g <sup>-1</sup> | 84.8% after 16000 cycles | Ref. 17   |
| MnNi-CoCH/CF//AC                                             | 5 A g <sup>-1</sup>   | 83.86% after 8000 cycles | Ref. 18   |
| (Ni <sub>3</sub> Co)Se <sub>2</sub> /Ni-CoLDH//PC            | 5 A g <sup>-1</sup>   | 90% after 3000 cycles    | Ref. 19   |
| NiCo <sub>2</sub> S <sub>4</sub> //AC                        | 10 A g <sup>-1</sup>  | 92.0% after 10000 cycles | Ref. 20   |
| P-Co <sub>3</sub> O <sub>4</sub> @P, N-C//Co@P, N-C          | 15 A g <sup>-1</sup>  | 92.9% after 5000 cycles  | Ref. 21   |
| Ni-Co LDH//RGO                                               | 5 A g <sup>-1</sup>   | 82% after 5000 cycles    | Ref. 22   |
| NiCo <sub>2</sub> Al-LDH//CC@ZPC                             | 5 A g <sup>-1</sup>   | 91.2% after 15000 cycles | Ref. 23   |
| HU-CuCo <sub>2</sub> S <sub>4</sub> //AC                     | 10 A g <sup>-1</sup>  | 85.0% after 10000 cycles | Ref. 24   |

## Reference

- 1 S. Zhang, D. Li, S. Chen, X. Yang, X. Zhao, Q. Zhao, S. Komarneni, D. Yang, *J. Mater. Chem. A*, 2017, **5**, 12453–12461.
- 2 L. Q. Fan, F. Pan, Q. M. Tu, Y. Gu, J. L. Huang, Y. F. Huang and J. H. Wu, *Int. J. Hydrogen Energy*, 2018, **43**, 23372–23381.
- 3 L. Lin, S. Tang, S. Zhao, X. Peng and N. Hu, *Electrochim. Acta*, 2017, **228**, 175–182.
- 4 C. Gong, M. Huang, P. Zhou, Z. Sun, L. Fan, J. Lin and J. Wu, *Appl. Surf. Sci.*, 2016, **362**, 469–476.
- 5 Y. Zhao, J. Guo, A. Liu and T. Ma, *J. Alloys Compd.*, 2020, **814**, 152271.
- 6 J. Yang, L. Lian, H. Ruan, F. Xie and M. Wei, *Electrochim. Acta*, 2014, **136**, 189–194.
- 7 X. Cao, L. Cui, B. Liu, Y. Liu, D. Jia, W. Yang, J. M. Razal and J. Liu, *J. Mater. Chem. A*, 2019, **7**, 3815–3827.
- 8 H. Gao, J. Xiang and Y. Cao, *Appl. Surf. Sci.*, 2017, **413**, 351–359.
- 9 L. Sui, S. Tang, Y. Chen, Z. Dai, H. Huangfu, Z. Zhu, X. Qin, Y. Deng and G. M. Haarberg, *Electrochim. Acta*, 2015, **182**, 1159–1165.
- 10 J. Li, Z. Liu, Q. Zhang, Y. Cheng, B. Zhao, S. Dai, H. H. Wu, K. Zhang, D. Ding, Y. Wu, M. Liu and M. S. Wang, *Nano Energy*, 2019, **57**, 22–33.
- 11 S. Adhikari, S. Selvaraj, S. H. Ji and D. H. Kim, *Small*, 2020, **16**, 2005414.
- 12 X. Zhang, F. Yang, H. Chen, K. Wang, J. Chen, Y. Wang and S. Song, *Small*, 2020, **16**, 2004118.
- 13 Q. Yang, Q. Wang, Y. Long, F. Wang, L. Wu, J. Pan, J. Han, Y. Lei, W. Shi and S. Song, *Adv. Energy Mater.*, 2020, **10**, 1903193.
- 14 X. Li, H. Wu, A. M. Elshahawy, L. Wang, S. J. Pennycook, C. Guan and J. Wang, *Adv. Funct.*

- Mater.*, 2018, **28**, 1800036.
- 15 W. He, G. Zhao, P. Sun, P. Hou, L. Zhu, T. Wang, L. Li, X. Xu and T. Zhai, *Nano Energy*, 2019, **56**, 207–215.
- 16 H. Liang, J. Lin, H. Jia, S. Chen, J. Qi, J. Cao, T. Lin, W. Fei and J. Feng, *J. Mater. Chem. A*, 2018, **6**, 15040–15046.
- 17 X. L. Guo, J. M. Zhang, W. N. Xu, C. G. Hu, L. Sun and Y. X. Zhang, *J. Mater. Chem. A*, 2017, **5**, 20579–20587.
- 18 X. Cao, Y. Liu, Y. Zhong, L. Cui, A. Zhang, J. M. Razal, W. Yang and J. Liu, *J. Mater. Chem. A*, 2020, **8**, 1837–1848.
- 19 X. Li, H. Wu, C. Guan, A. M. Elshahawy, Y. Dong, S. J. Pennycook and J. Wang, *Small*, 2019, **15**, 1803895.
- 20 B. Y. Guan, L. Yu, X. Wang, S. Song and X. W. D. Lou, *Adv. Mater.* 2017, **29**, 1605051.
- 21 S. Liu, Y. Yin, Y. Shen, K. S. Hui, Y. T. Chun, J. M. Kim, K. N. Hui, L. Zhang and S. C. Jun, *Small*, 2020, **16**, 1906458.
- 22 H. Chen, L. Hu, M. Chen, Y. Yan and L. Wu, *Adv. Funct. Mater.*, 2014, **24**, 934–942.
- 23 X. Gao, X. Liu, D. Wu, B. Qian, Z. Kou, Z. Pan, Y. Pang, L. Miao and J. Wang, *Adv. Funct. Mater.*, 2019, **29**, 1903879.
- 24 H. Jia, Y. Cai, Z. Wang, X. Zheng, C. Li, H. Liang, J. Qi, J. Cao, J. Feng and W. Fei, *Inorg. Chem. Front.*, 2020, **7**, 603–609.
